# Supplementary material for: Genetic polymorphism and transcriptional regulation of CREBBP gene in patient with diffuse large B-cell lymphoma
Source: PubMed Central journal article supplement (PMC6692565; doi:10.1042/bsr20191162), 2019-08-13

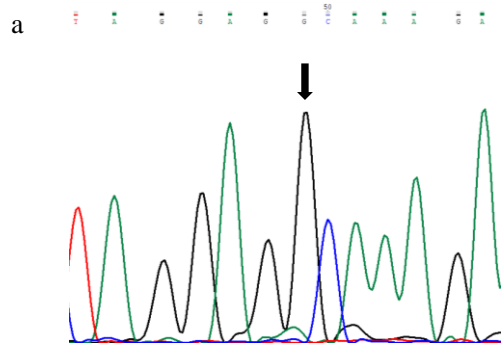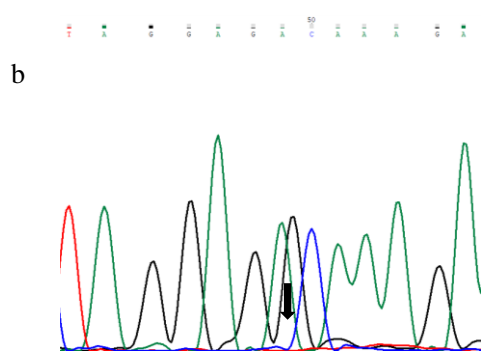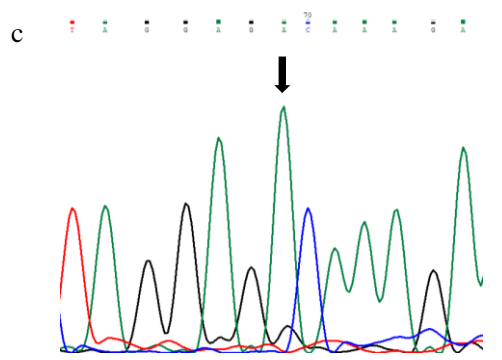

Supplement: bsr20191162_Supp1.pdf [file bsr20191162_Supp1.pdf]
